# Supplementary material for: Non-linear Analysis of Scalp EEG by Using Bispectra: The Effect of the Reference Choice
Source: PubMed Central journal article supplement (PMC5432555; doi:10.3389/fnins.2017.00262), 2017-05-16
Supplement: Image1.pdf [file Image1.pdf]

## ***Supplementary Material:*** **Non-linear Analysis of Scalp EEG by Using Bispectra: The Effect of the Reference Choice**

**Federico Chella**<sup>1,2,\*</sup>, **Antea D'Andrea**<sup>1,2</sup>, **Alessio Basti**<sup>1,2</sup>, **Vittorio Pizzella**<sup>1,2</sup>  
**and Laura Marzetti**<sup>1,2,\*</sup>

\*Correspondence:  
Federico Chella  
federico.chella@unich.it

Laura Marzetti  
laura.marzetti@unich.it

### **1 SUPPLEMENTARY FIGURE**

Figure S1 shows the plots of bicoherence as a function of frequencies  $f_1$  and  $f_2$  and for each of the 10 subjects participating to the real data experiment. In particular, this figure represents the results obtained from the datasets re-referenced to  $REST_{ind}$ . Similar results (not shown here) were obtained for all the other reference schemes. Note that the bicoherence was estimated for each of the  $N$  channels and, thus,  $N$  estimates were obtained for each frequency pair. However, only the maximum over these  $N$  estimates can be appreciated from these plots. A common feature of all subjects is a prominent peak of bicoherence at around  $(f_1, f_2) = (10 \text{ Hz}, 10 \text{ Hz})$ , which reflects a nonlinear coupling between EEG signal components in the alpha ( $f_1 = f_2 = 10 \text{ Hz}$ ) and beta ( $f_3 = f_1 + f_2 = 20 \text{ Hz}$ ) bands.

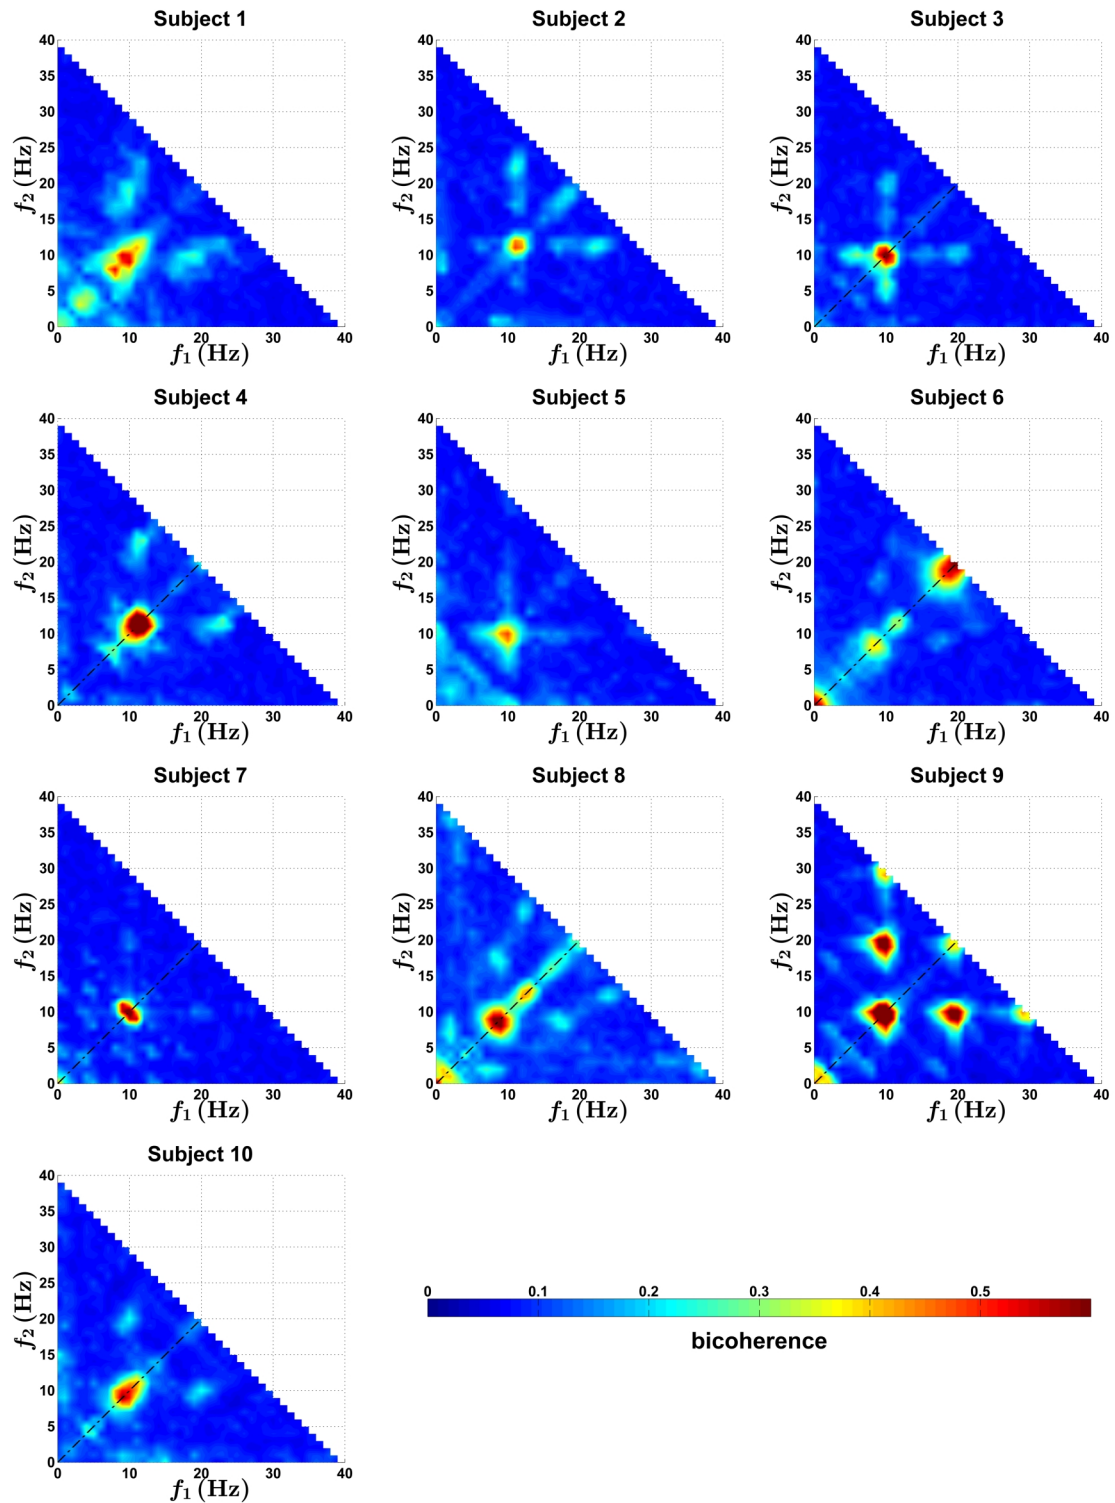

**Figure S1.** Plots of bicoherence as a function of frequencies  $f_1$  and  $f_2$  and for each of the 10 subjects participating to the real data experiment. These plots were obtained from the dataset re-referenced to  $REST_{ind}$ .
